# Supplementary material
Source: PubMed Central journal article supplement (PMC5357178)

## SUPPLEMENTAL INFORMATION

The supplemental data includes four supplemental figures with legends

### **Figure S1. Oxidant Exposure Exhibits Persistent MCU-Mediated $[Ca^{2+}]_m$ Uptake. Related to Figure 1.**

(A) Mean traces for  $[Ca^{2+}]_m$  (GCaMP2-mt) fluorescence measured in control,  $H_2O_2$  and  $H_2O_2 + MnSOD$  treated HeLa cells. (B) Quantification of normalized GCaMP2-mt fluorescence at peak and 600 s. Bar represents Mean  $\pm$  SEM; \*  $P < 0.05$ ;  $n = 4$ . (C) Mean traces of  $[Ca^{2+}]_c$  (Fluo-4) fluorescence measured in control,  $H_2O_2$  and  $H_2O_2 + MnSOD$  treated HeLa cells. (D) Bar graph represents peak Fluo-4 fluorescence after histamine stimulation. Data indicate Mean  $\pm$  SEM; ns-not significant,  $n=4$ . (E) Representative confocal images showing HyPer-dMito fluorescence in control and LPS treated HPMVECs (left). Scatter plot of HyPer-dMito fluorescence in HPMVECs (right). Data indicate Mean  $\pm$  SEM; \*\*\*  $P < 0.001$ . (F) Representative confocal images showing MitoSox Red fluorescence from control and H/R subjected primary adult cardiomyocytes (left). Scatter plot of MitoSox Red fluorescence in myocytes (right). Data indicate Mean  $\pm$  SEM; \*\*\*  $P < 0.001$ . (G) Representative  $[Ca^{2+}]_{out}$  traces in Neonatal Rat Ventricular Myocytes (NRVM) exposed to normoxia and H/R. Permeabilized cells were loaded with extramitochondrial  $Ca^{2+}$  ( $[Ca^{2+}]_{out}$ ) indicator Fura2FF to which a single  $10 \mu M Ca^{2+}$  pulse was added to assess the  $[Ca^{2+}]_{out}$  clearance rate. (H) Quantification of the rate of  $[Ca^{2+}]_m$  uptake as a function of decrease in  $[Ca^{2+}]_{out}$ . Data represents Mean  $\pm$  SEM; \*\* $P < 0.01$ ;  $n = 4$ . (I) Representative  $[Ca^{2+}]_{out}$  traces in NRVMs after addition of CCCP. (J) Quantification of total matrix  $[Ca^{2+}]_m$  released following  $10 \mu M Ca^{2+}$  pulse. Data represents Mean  $\pm$  SEM; \*\* $P < 0.01$ ;  $n = 4$ . (K) Oxidative stress-induced modification of MCU complex. HEK293T cells expressing Flag-tagged MCU,

MCUb, MICU1, MCUR1 and EMRE were exposed to menadione (10  $\mu$ M) for 10 min. Lysates were prepared, incubated with mPEG5 and Western blotted with FLAG antibody. **(L and M)** NRVMs expressing MCU-FLAG (Ad MCU) were exposed to menadione, isoproterenol (10  $\mu$ M) or H/R. Lysates were prepared, incubated with mPEG5 and Western blotted with FLAG antibody (n = 3).

**Figure S2. MCU Mutants reside in the mitochondrial inner membrane and alter MCU-Mediated  $[Ca^{2+}]_m$  Uptake. Related to Figure 2.**

**(A)** Alignment of MCU sequence indicating the conserved cysteine residues among species. **(B)** Confocal micrographs of HeLa cells co-transfected with matrix localized GCaMP2-mt (green) and, either MCU WT-mRFP or mRFP-tagged MCU cysteine mutants. **(C)** Mean traces of  $[Ca^{2+}]_c$  (Fluo-4) fluorescence in HeLa cells expressing Vector control, MCU<sup>WT</sup>, MCU<sup>C97A</sup>, and MCU<sup>CF</sup>. After baseline recording, cells were treated with SERCA inhibitor, Thapsigargin (Tg; 2  $\mu$ M) and changes in fluorescence were measured. **(D)** Quantification of  $[Ca^{2+}]_c$  fluorescence after Tg addition. Data represents Mean  $\pm$  SEM; n = 5-7. **(E)** Bar graph showing the mitochondrial membrane potential indicator, TMRM fluorescence in control vector, MCU, MCU<sup>C97A</sup>, and MCU<sup>CF</sup> HeLa cells. Data represents Mean  $\pm$  SEM; n = 5. **(F)** Mean traces of  $[Ca^{2+}]_m$  (GCaMP2-mt) fluorescence in HeLa cells expressing MCU<sup>WT</sup>, MCU<sup>C67A</sup>, and MCU<sup>C191A</sup>. After baseline recording, cells were stimulated with histamine and changes in fluorescence were measured. **(G)** Quantification of normalized GCaMP2-mt peak fluorescence. Data represents Mean  $\pm$  SEM; n = 5-7. **(H)** Mean traces of  $[Ca^{2+}]_c$  (Fluo-4) fluorescence measured in HeLa cells expressing MCU, MCU<sup>C67A</sup>, and MCU<sup>C191A</sup>. **(I)** Quantification of normalized (Fluo-4) peak fluorescence. Data represents Mean  $\pm$  SEM; n = 5-7. **(J)** Representative  $[Ca^{2+}]_{out}$  traces before and after CCCP (3  $\mu$ M) addition in HeLa cells stably expressing control vector, MCU, MCU<sup>C97A</sup>,

and MCU<sup>CF</sup>. **(K)** Quantification of resting matrix  $[Ca^{2+}]_m$  after the addition of CCCP. Data represents Mean  $\pm$  SEM; \*\*P <0.01; n = 3. **(L)** Representative  $[Ca^{2+}]_{out}$  traces before and after CCCP (3  $\mu$ M) addition in HPMVECs stably expressing control vector, MCU, MCU<sup>C97A</sup>, and MCU<sup>CF</sup>. **(M)** Quantification of resting matrix  $[Ca^{2+}]_m$  after the addition of CCCP. Data represents Mean  $\pm$  SEM; \*\*P <0.01; n = 3.

**Figure S3. Interaction between MCU and its regulatory components are unaffected by MCU cysteine mutation. Related to Figure 2.**

**(A)** COS-7 cells were transfected with HA-tagged MCU and, either Flag-tagged MCU or MCU cysteine (MCU<sup>C97A</sup>, and MCU<sup>CF</sup>) mutants as indicated. Following immunoprecipitation with HA antibody, total cell lysates and immunoprecipitated materials were subjected to Western blot analysis. Samples were probed with anti-Flag (top) and anti-HA antibodies (bottom). (n=3).

**(B)** COS-7 cells were transfected with V5-tagged MCUR1 and, either Flag-tagged MCU or MCU cysteine (MCU<sup>C97A</sup>, and MCU<sup>CF</sup>) mutants as indicated. Following immunoprecipitation with V5 antibody, total cell lysates and immunoprecipitated materials were subjected to Western blot analysis. Samples were probed with anti-Flag (top) and anti-V5 antibodies (bottom). (n=3).

**(C)** COS-7 cells were transfected with HA-tagged EMRE and, either Flag-tagged MCU or MCU cysteine (MCU<sup>C97A</sup>, and MCU<sup>CF</sup>) mutants as indicated. Following immunoprecipitation with HA antibody, total cell lysates and immunoprecipitated materials were subjected to Western blot analysis. Samples were probed with anti-Flag (top) and anti-HA antibodies (bottom). (n=3).

**(D)** COS-7 cells were transfected with HA-tagged MCUB and, either Flag-tagged MCU or MCU cysteine (MCU<sup>C97A</sup>, and MCU<sup>CF</sup>) mutants as indicated. Following immunoprecipitation with HA antibody, total cell lysates and immunoprecipitated materials were subjected to Western blot analysis. Samples were probed with anti-Flag (top) and anti-HA antibodies (bottom). (n=3).

**(E)** MCU-MICU1 interaction is intact in MCU<sup>C97A</sup> mutant. COS-7 cells were transfected with HA-tagged MICU1 and Flag-tagged MCU, MCU<sup>C97A</sup>, and MCU<sup>CF</sup> as indicated. Following immunoprecipitation with HA antibody, total cell lysates and immunoprecipitated materials were subjected to Western blot analysis. Cell lysates were probed with anti-Flag (top left) or anti-HA antibodies (bottom left) to serve as input. Immunoprecipitated samples were probed with anti-Flag (top right) and anti-HA antibodies (bottom right). (n=3).

**Figure S4. Oxidation of MCU Enables MCU Complex Redistribution at the Inner Mitochondrial Membrane. Related to Figure 5.**

**(A)** MCU-WT was tagged with a photo-switchable protein, mEOS3.2. HeLa cells were transfected, fixed, and imaged using super-resolution photoactivatable localization microscopy (PALM). The HeLa cells were treated with menadione for various time points (2, 5, 15, 20 minutes). The blue box marks the magnified area (right panels).

**(B)** Nanoclustering of MCU WT-mEOS3.2 was conducted as previously described (Baumgart et al., 2016). The normalized density of ( $\rho/\rho_0$ ) molecules was plotted against the relative area covered by the clusters ( $\eta$ ). The red line fitted to the graph denotes 100% randomly distributed molecules, while true clustering has a higher density ( $\rho/\rho_0$ ) of molecules along a higher percentage of the area covered by the clusters ( $\eta$ ). MCU-WT showed increased clustering with increasing time points of menadione treatment as depicted by the higher  $\rho/\rho_0$ . (n=4-7) For each condition, we randomly quantified 5 cells for cluster analysis.



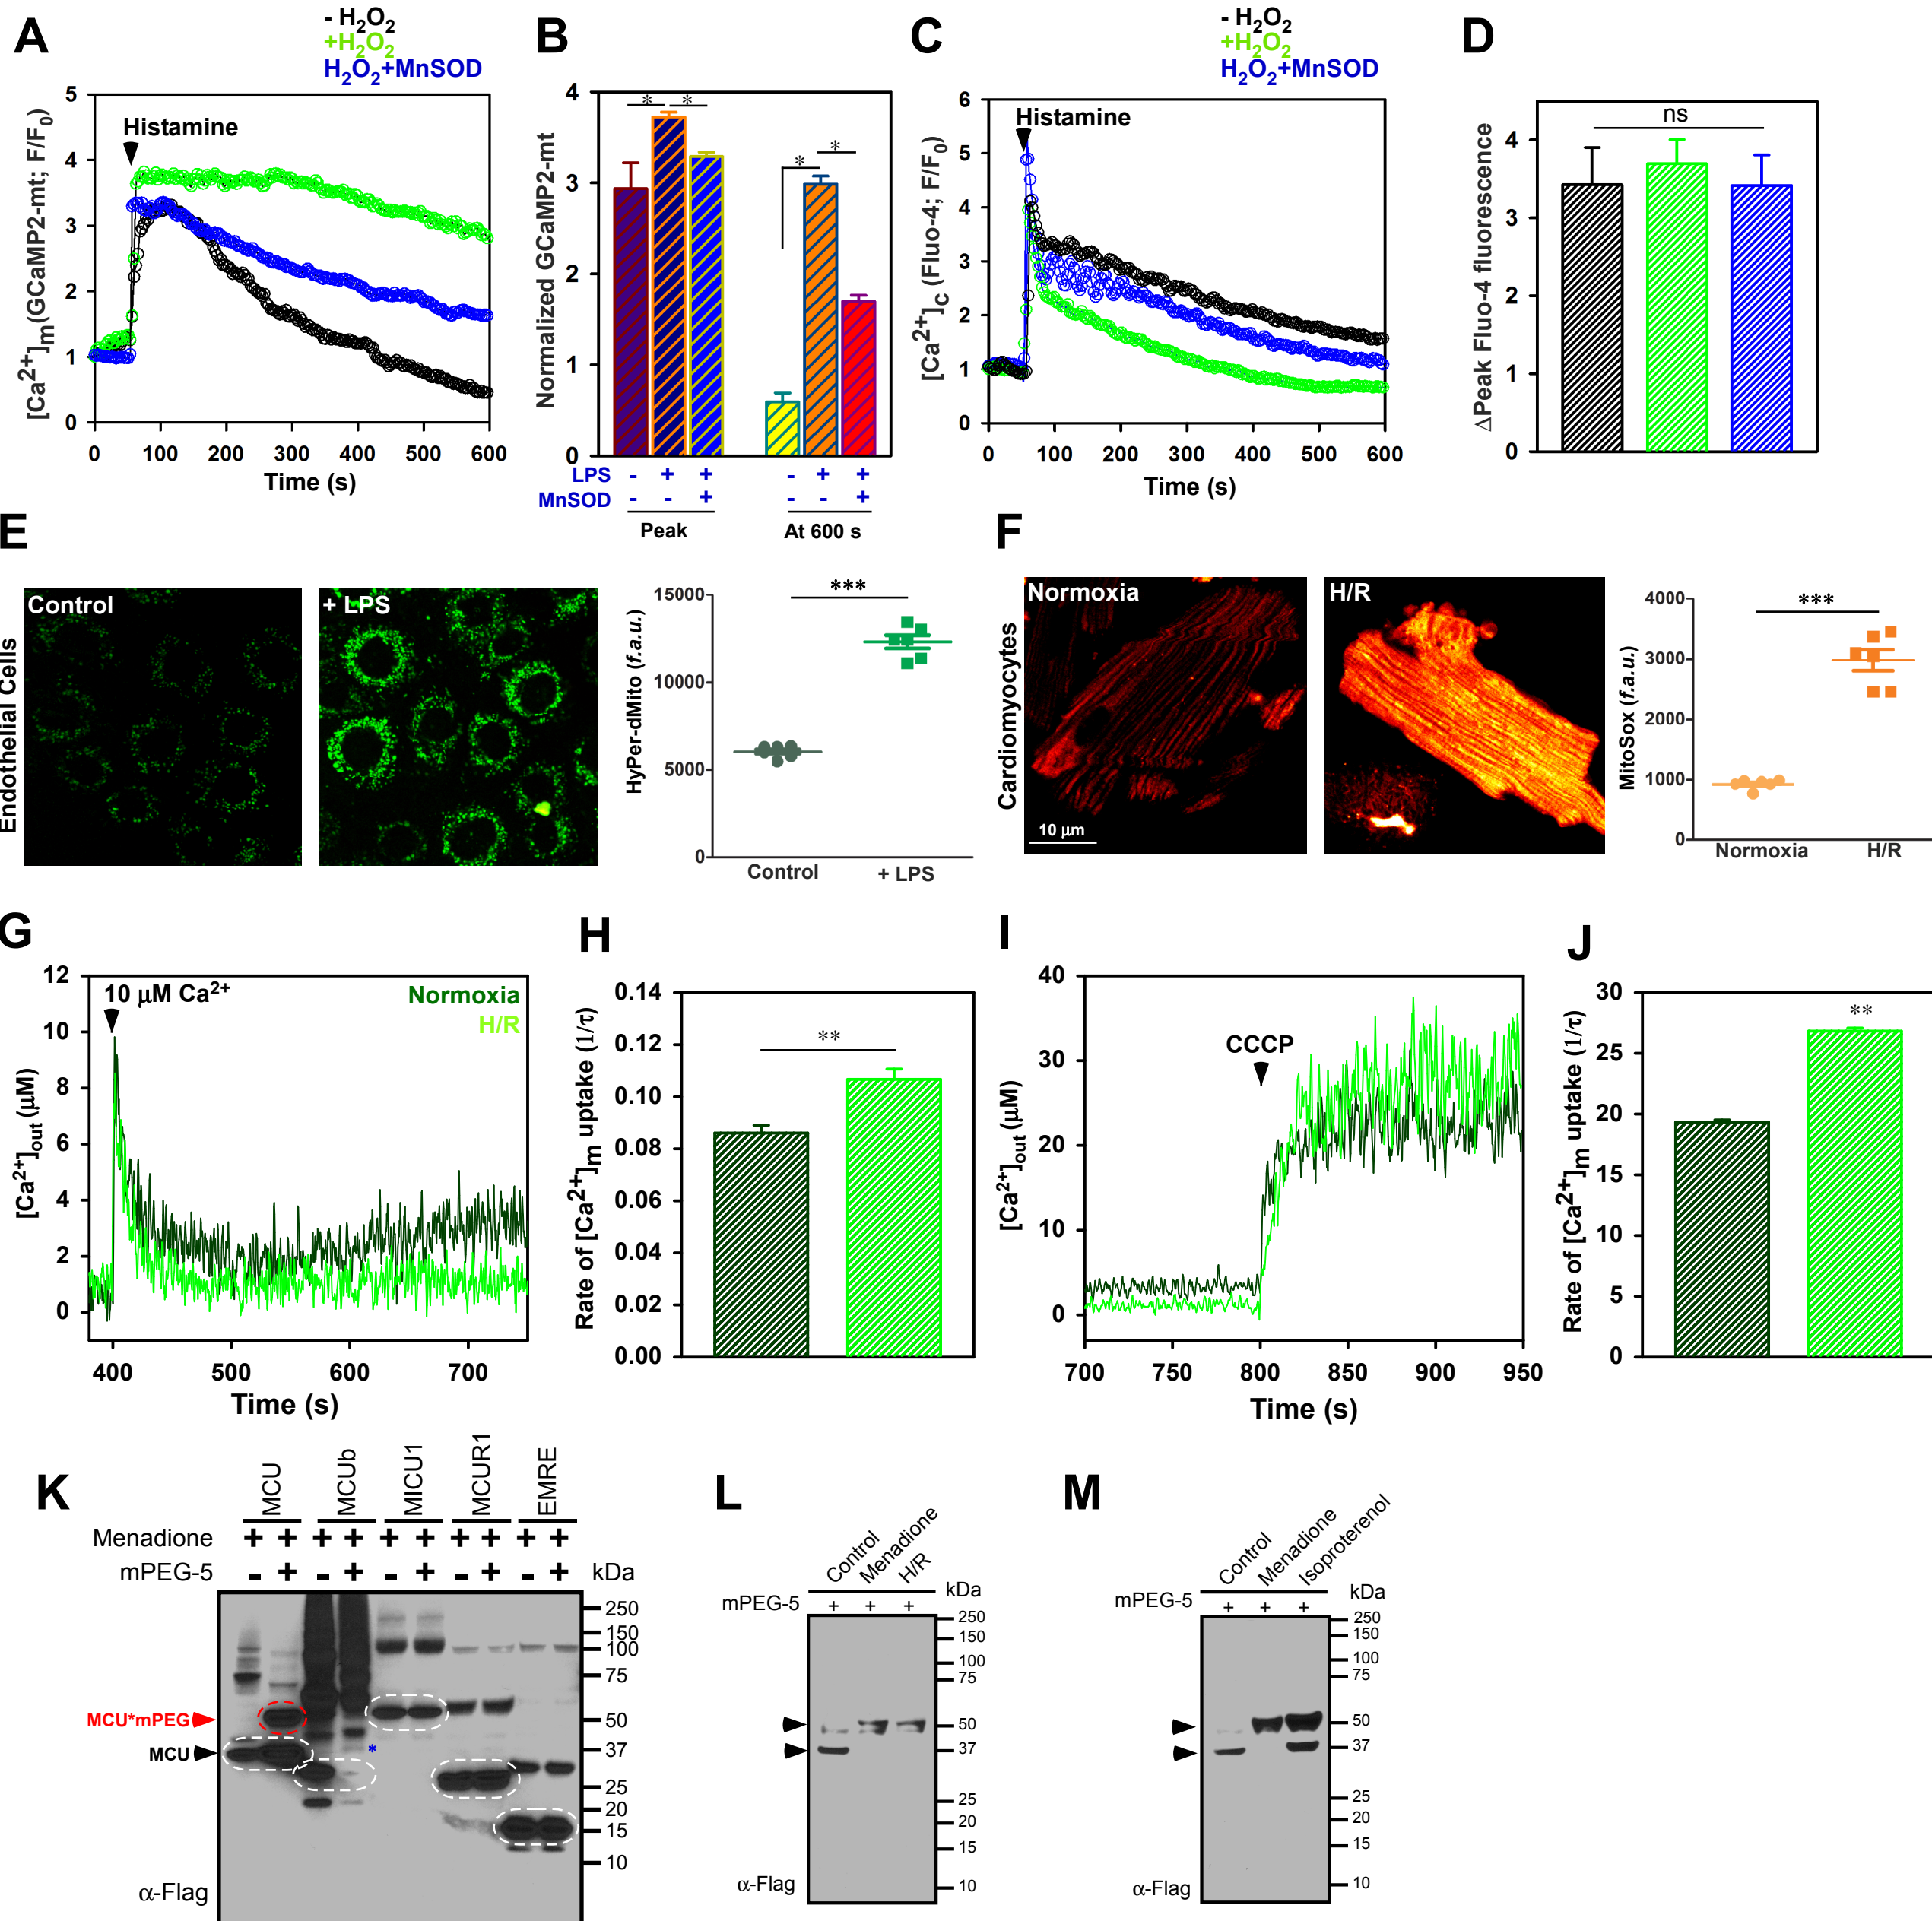







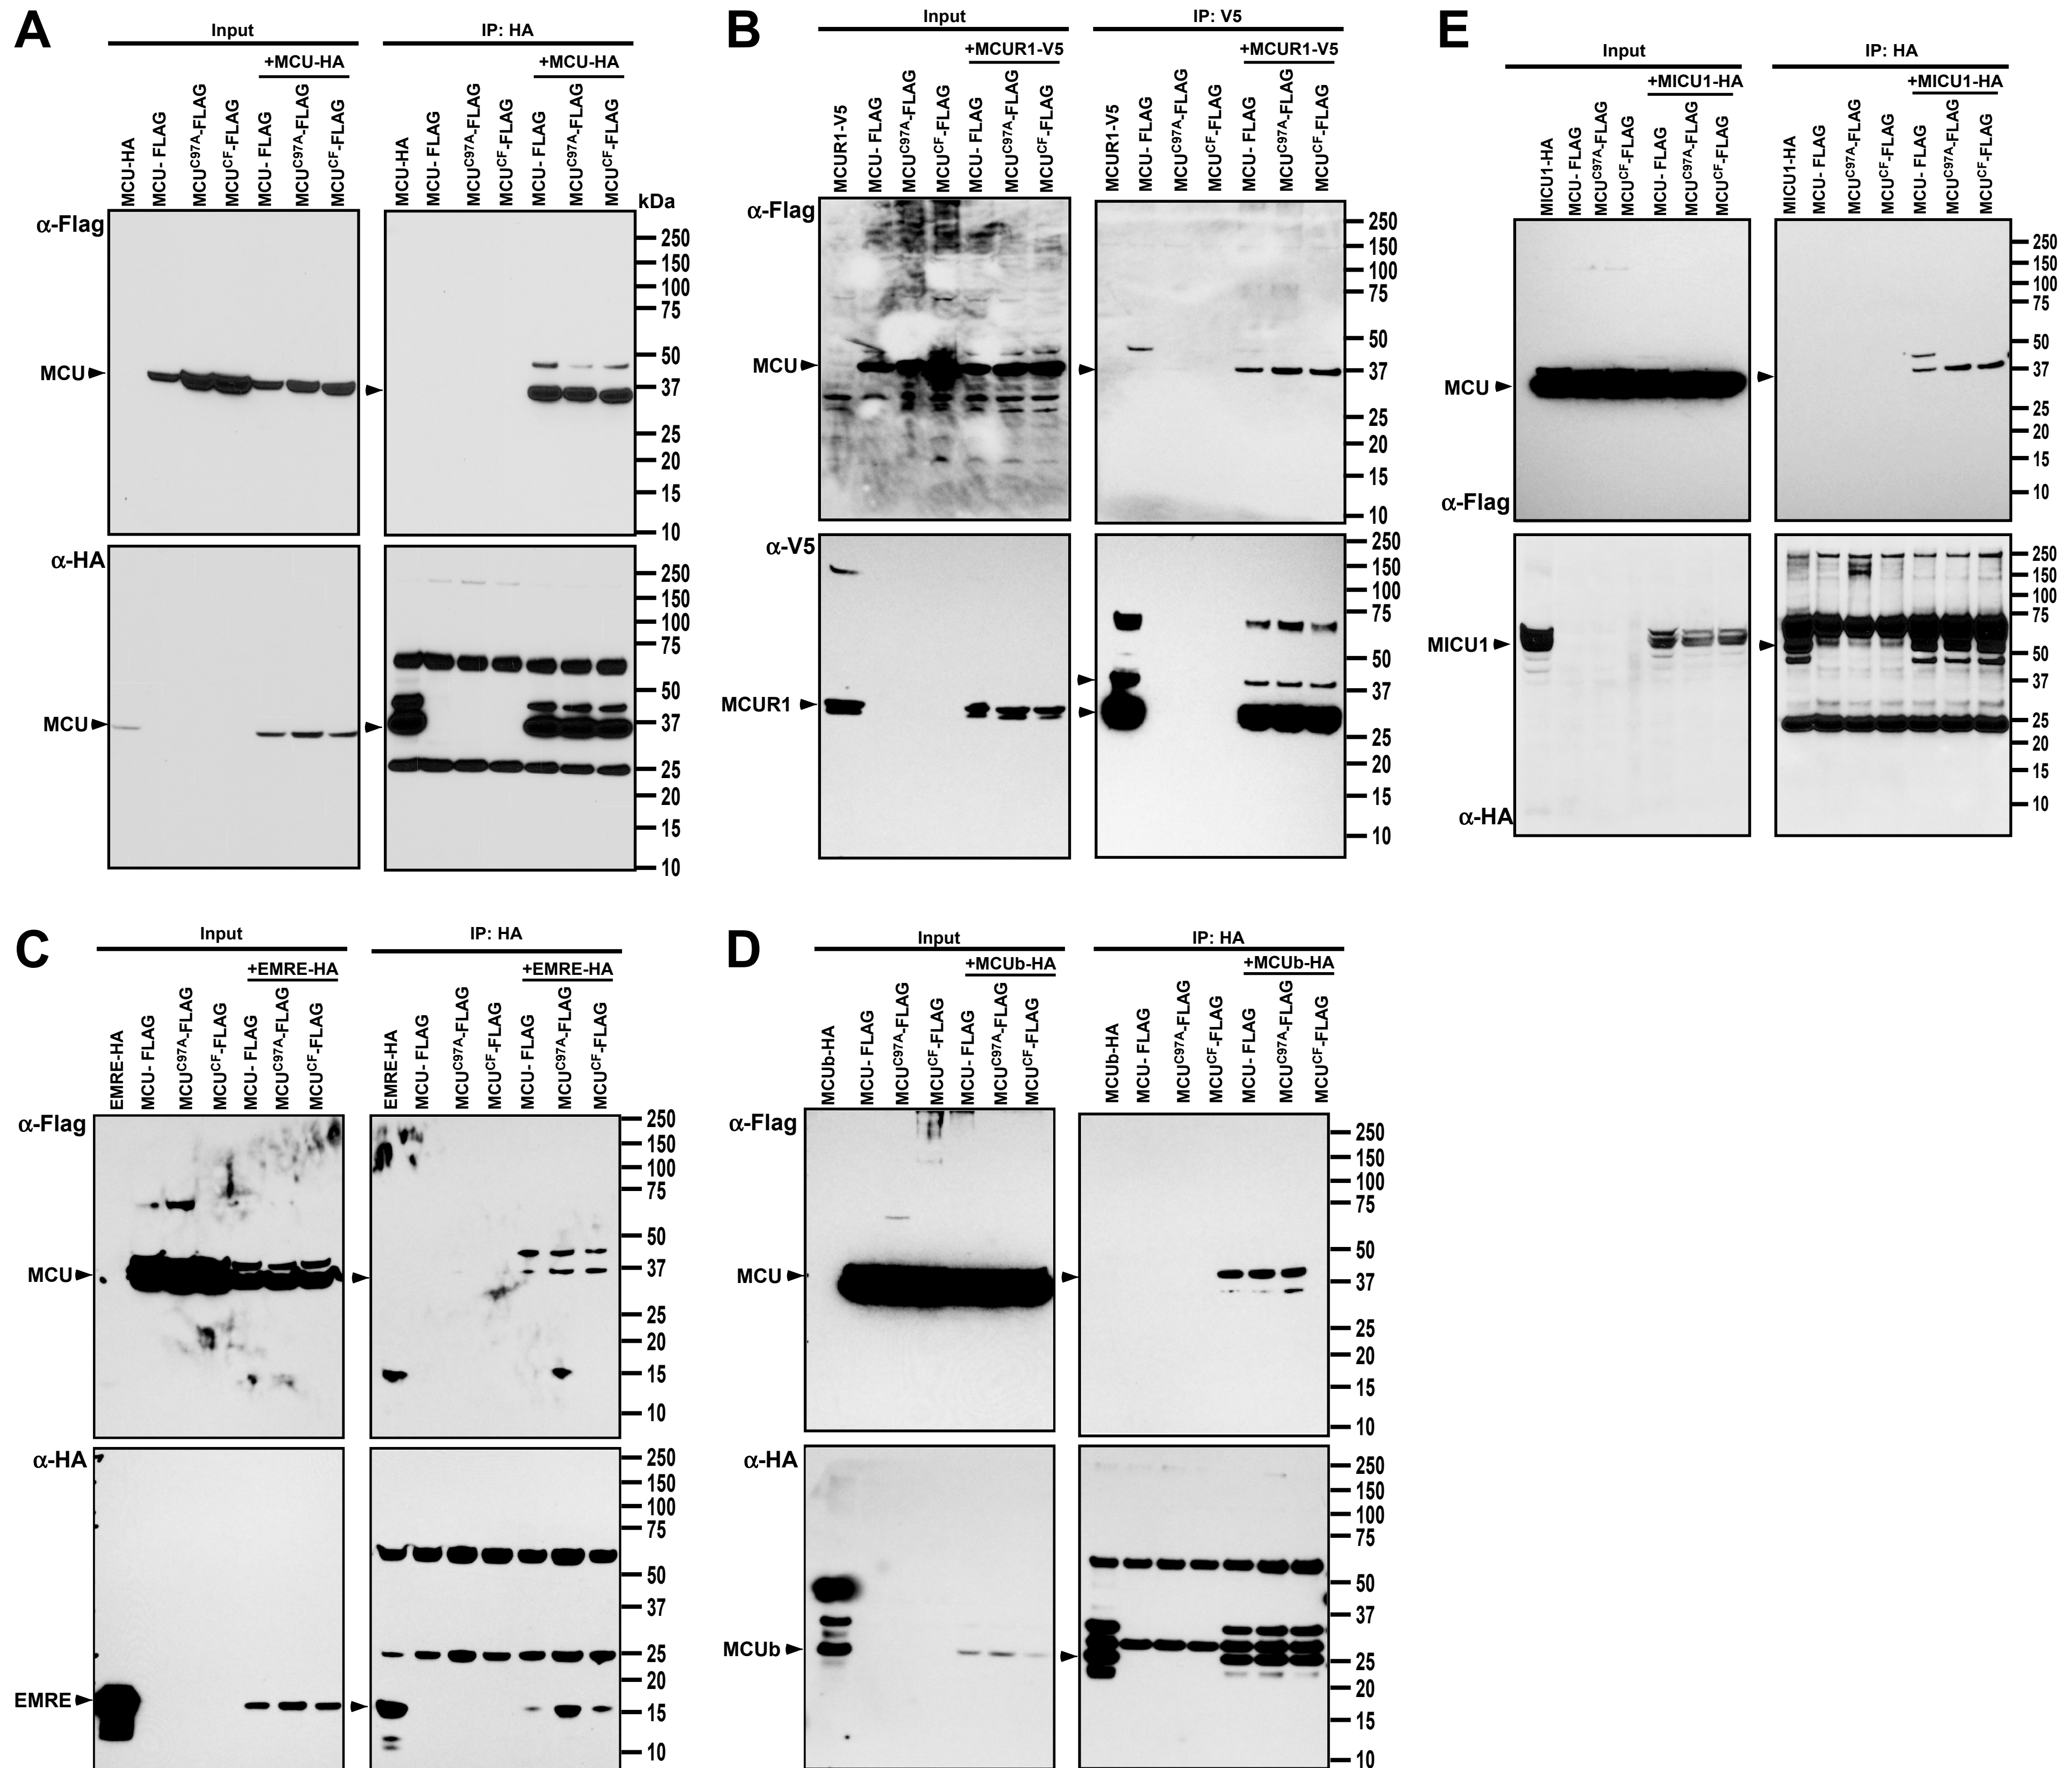



A

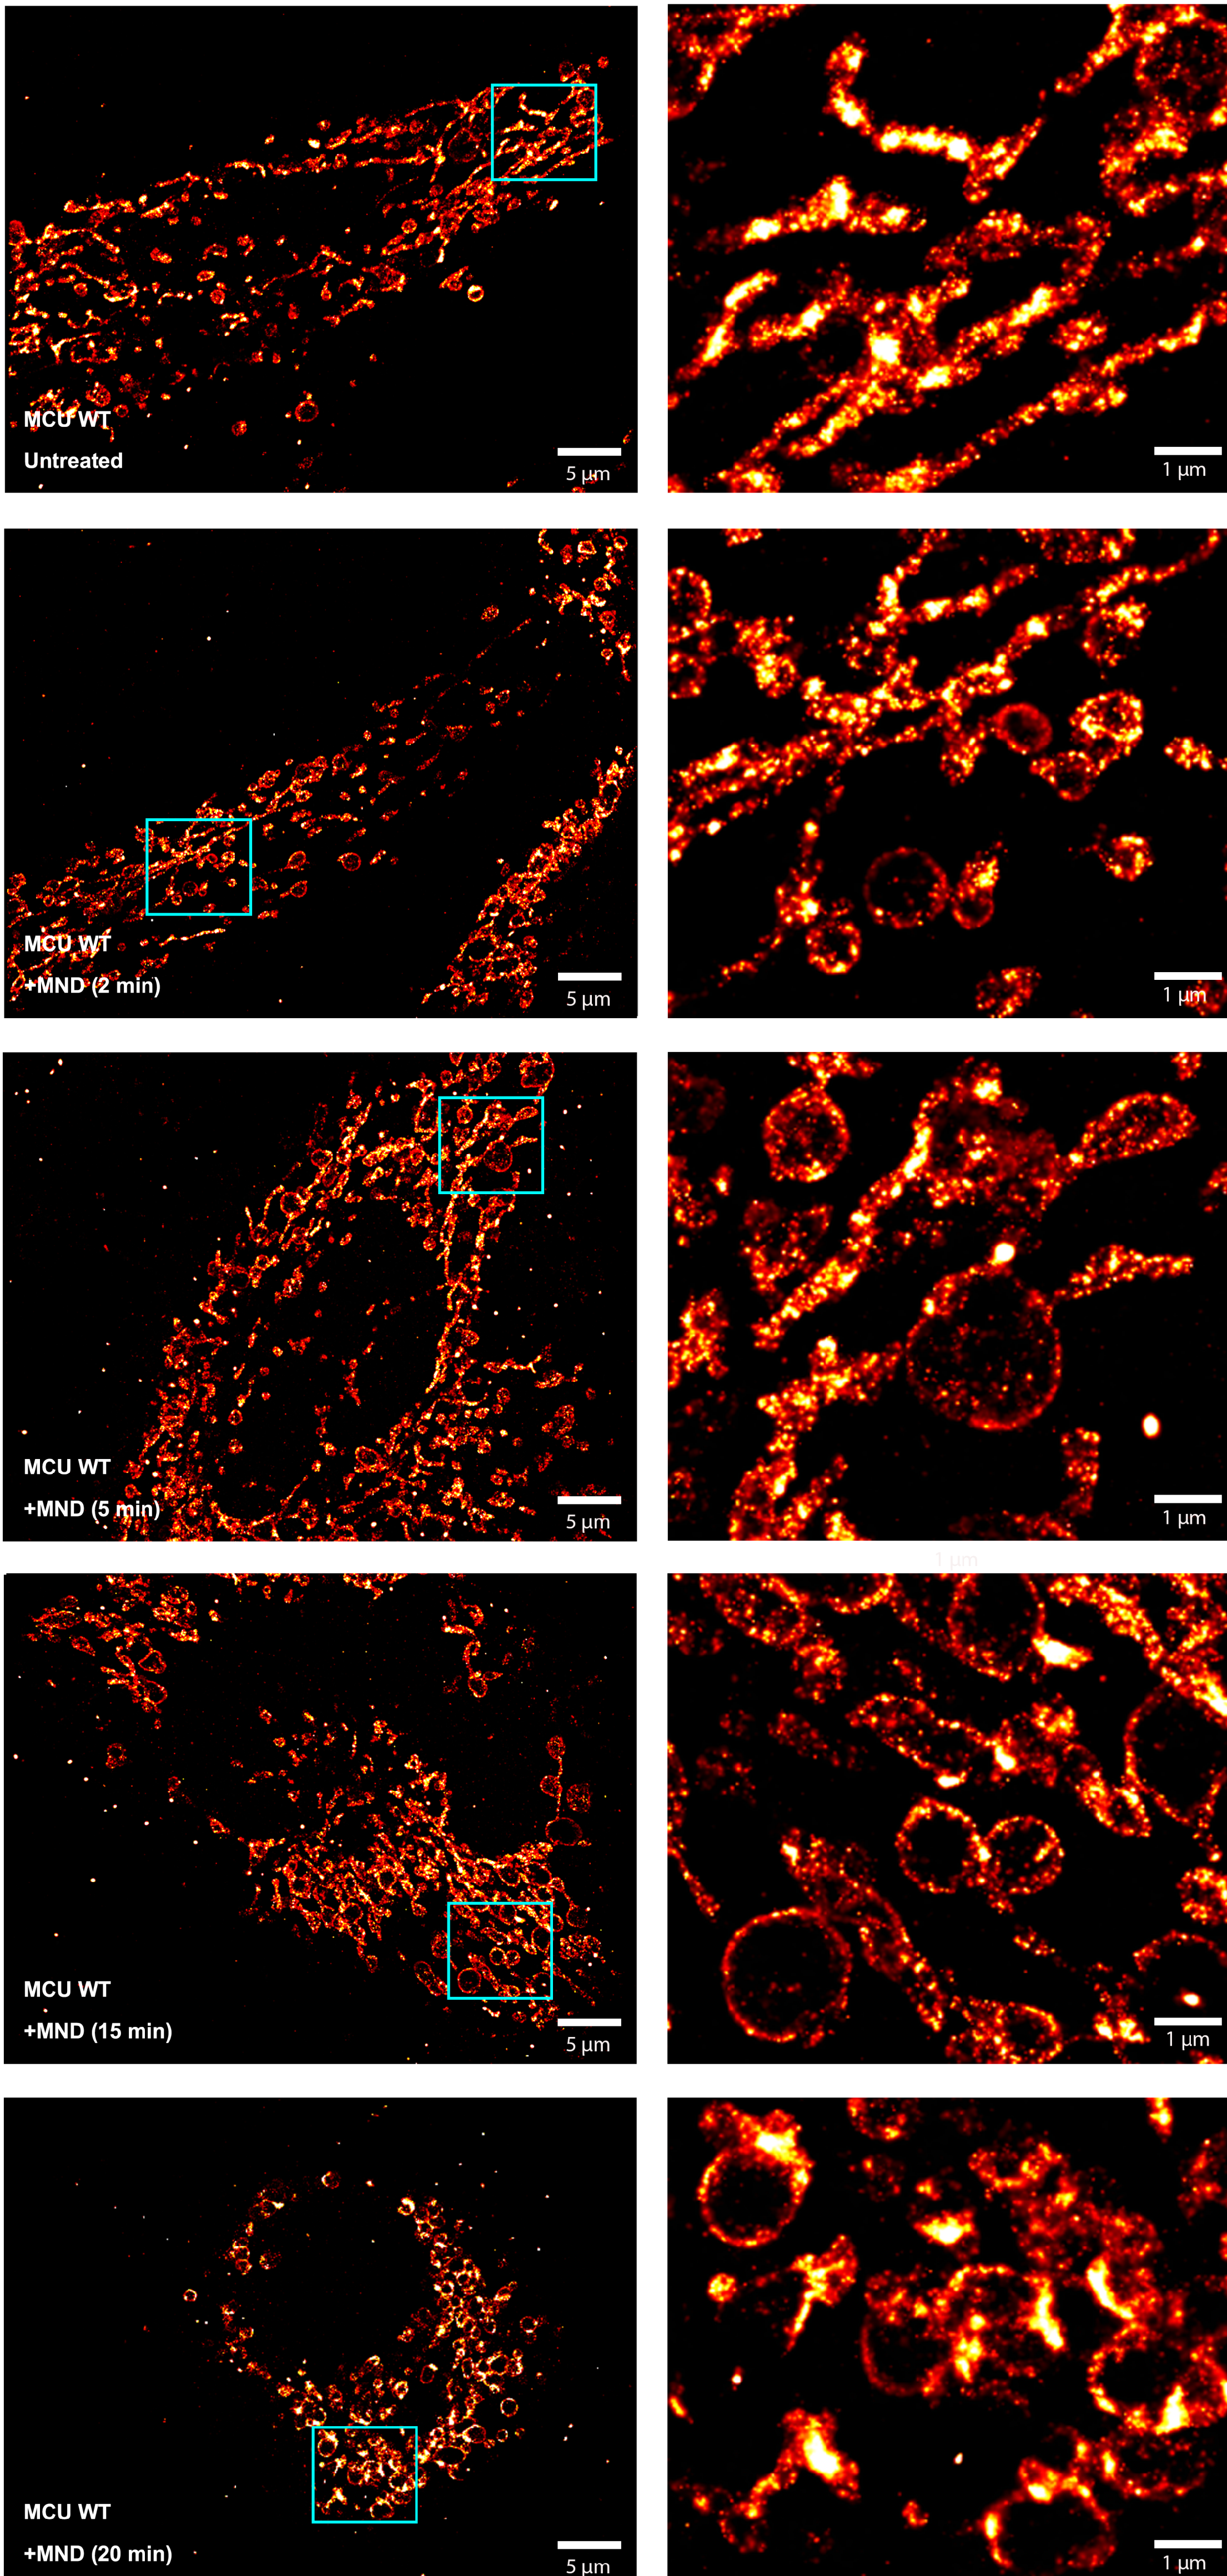

B

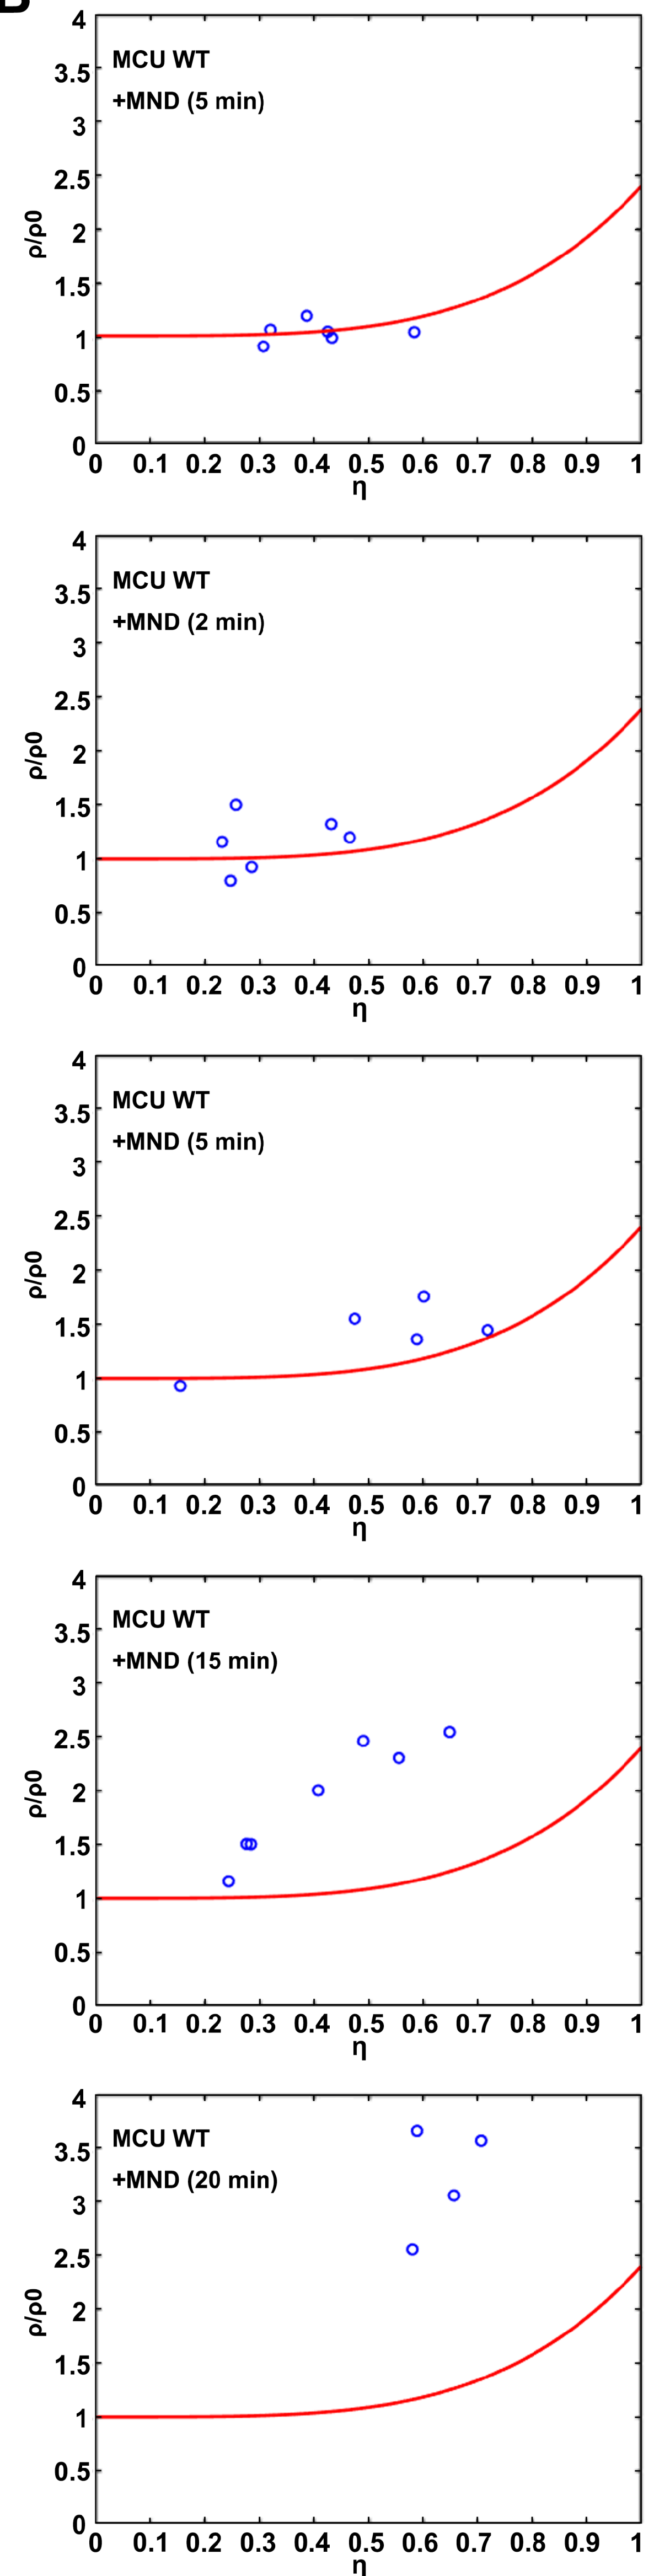

Supplement: NIHMS848612-supplement.pdf [file NIHMS848612-supplement.pdf]
